# Supplementary material for: Potyviral Helper-Component Protease: Multifaced Functions and Interactions with Host Proteins
Source: MDPI journal article supplement (doi:10.3390/plants13091236), 2024-04-29
Supplement: s1 [file s1]

**Table S2.** Selected proteins containing the YxVGG sequence motif that could be possibly cleaved by HC-Pro. The role in viral infection shows a possibility how the plant protein cleavage by HC-Pro could help the virus to spread or to influence the plant metabolism.

| Plant protein                                                                     | Plant                                                              | ID                                | Sequence         | Role in viral infection                                                                                                                                                                                                                                                                                                                                                                                                                                                                                                                                                                                                                                                                  |
|-----------------------------------------------------------------------------------|--------------------------------------------------------------------|-----------------------------------|------------------|------------------------------------------------------------------------------------------------------------------------------------------------------------------------------------------------------------------------------------------------------------------------------------------------------------------------------------------------------------------------------------------------------------------------------------------------------------------------------------------------------------------------------------------------------------------------------------------------------------------------------------------------------------------------------------------|
| ATP synthase subunit $\beta$ , mitochondrial (EC 7.1.2.2)                         | <i>Actinidia deliciosa</i> (Kiwi)                                  | >sp P43395 A TPBM_ACTD E (173 aa) | 152 - 156: YmVGG | In apple plants, the mitochondrial ATP synthase oligomycin sensitivity-conferring protein subunit interacts with apple necrotic mosaic virus coat protein and facilitates its infection [1]. In chloroplasts, ATP synthase- $\alpha$ plays active roles in plant defense. Tobacco mosaic virus (TMV) infection reduced the expression levels of the ATP synthase- $\gamma$ gene and silencing ATPsyn- $\gamma$ in <i>Nicotiana benthamiana</i> increased TMV accumulation and pathogenicity [2]. HC-Pro was shown to decrease the amount of ATP-synthase CF1 $\beta$ -subunit in PVY-infected plants [3,4] and also to interact with Ca <sup>2+</sup> -dependent ATP-synthase, MinD [5]. |
| ATP synthase subunit $\beta$ -1, mitochondrial (EC 7.1.2.2)                       | <i>Arabidopsis thaliana</i>                                        | >sp P83483 A TPBM_ARAT H (556 aa) | 535 - 539: YmVGG |                                                                                                                                                                                                                                                                                                                                                                                                                                                                                                                                                                                                                                                                                          |
| ATP synthase subunit $\beta$ , mitochondrial (EC 7.1.2.2)                         | <i>Chlamydomonas reinhardtii</i> ( <i>Chlamydomonas smithii</i> )  | >sp P38482 A TPBM_CHLR E (574 aa) | 487 - 491: YmVGG |                                                                                                                                                                                                                                                                                                                                                                                                                                                                                                                                                                                                                                                                                          |
| ATP synthase subunit $\beta$ , mitochondrial (EC 7.1.2.2)                         | <i>Hevea brasiliensis</i> ( <i>Siphonia brasiliensis</i> )         | >sp P29685 A TPBM_HEVB R (562 aa) | 541 - 545: YmVGG |                                                                                                                                                                                                                                                                                                                                                                                                                                                                                                                                                                                                                                                                                          |
| ATP synthase subunit $\beta$ , mitochondrial (EC 7.1.2.2)                         | <i>Zea mays</i>                                                    | >sp P19023 A TPBM_MAIZE (553 aa)  | 532 - 536: YmVGG |                                                                                                                                                                                                                                                                                                                                                                                                                                                                                                                                                                                                                                                                                          |
| ATP synthase subunit $\beta$ , mitochondrial (EC 7.1.2.2)                         | <i>Nicotiana glauca</i>                                            | >sp P17614 A TPBM_NICPL (560 aa)  | 539 - 543: YmVGG |                                                                                                                                                                                                                                                                                                                                                                                                                                                                                                                                                                                                                                                                                          |
| ATP synthase subunit $\beta$ , mitochondrial (EC 7.1.2.2).                        | <i>Oryza sativa</i> subsp. <i>japonica</i>                         | >sp Q01859 A TPBM_ORYSJ (552 aa)  | 531 - 535: YmVGG |                                                                                                                                                                                                                                                                                                                                                                                                                                                                                                                                                                                                                                                                                          |
| ATP synthase subunit $\beta$ -2, mitochondrial (EC 7.1.2.2)                       | <i>Arabidopsis thaliana</i>                                        | >sp P83484 A TPBM_ARAT H (556 aa) | 535 - 539: YmVGG |                                                                                                                                                                                                                                                                                                                                                                                                                                                                                                                                                                                                                                                                                          |
| ATP synthase subunit $\beta$ -3, mitochondrial (EC 7.1.2.2)                       | <i>Arabidopsis thaliana</i>                                        | >sp Q9C5A9 ATPBO_ARA TH (559 aa)  | 538 - 542: YmVGG |                                                                                                                                                                                                                                                                                                                                                                                                                                                                                                                                                                                                                                                                                          |
| Chlorophyll a-b binding protein 215, chloroplastic (LHCII type II CAB-215) (LHCP) | <i>Pisum sativum</i>                                               | >sp P27520 C B215_PEA (265 aa)    | 174 - 178: YrVGG | The photosynthetic rate of virus-infected plants is always reduced [4] Damaged photosynthetic complexes and degraded chloroplasts are related to plant viral infection [6].                                                                                                                                                                                                                                                                                                                                                                                                                                                                                                              |
| Chlorophyll a-b binding protein 151, chloroplastic (LHCII type II CAB-151) (LHCP) | <i>Gossypium hirsutum</i> ( <i>Gossypium mexicanum</i> )           | >sp P27518 C B21_GOSHI (265 aa)   | 174 - 178: YrVGG |                                                                                                                                                                                                                                                                                                                                                                                                                                                                                                                                                                                                                                                                                          |
| Chlorophyll a-b binding protein of LHCII type I, chloroplastic (CAB) (LHCP)       | <i>Lemna gibba</i>                                                 | >sp P12328 C B21_LEMGI (264 aa)   | 173 - 177: YrVGG |                                                                                                                                                                                                                                                                                                                                                                                                                                                                                                                                                                                                                                                                                          |
| Chlorophyll a-b binding protein type I, chloroplastic (CAB) (LHCP)                | <i>Pinus thunbergii</i> ( <i>Pinus thunbergiana</i> )              | >sp P10049 C B21_PINTH (266 aa)   | 175 - 179: YrVGG |                                                                                                                                                                                                                                                                                                                                                                                                                                                                                                                                                                                                                                                                                          |
| Chlorophyll a-b binding protein, chloroplastic                                    | <i>Silene latifolia</i> subsp. <i>alba</i> ( <i>Lychnis alba</i> ) | >sp P12332 C B21_SILLB (205 aa)   | 173 - 177: YrVGG |                                                                                                                                                                                                                                                                                                                                                                                                                                                                                                                                                                                                                                                                                          |

|                                                                                                                                     |                                                                |                                    |                    |                                                                                                                                                 |  |
|-------------------------------------------------------------------------------------------------------------------------------------|----------------------------------------------------------------|------------------------------------|--------------------|-------------------------------------------------------------------------------------------------------------------------------------------------|--|
| (LHCII type I CAB)<br>(LHCP).                                                                                                       |                                                                |                                    |                    |                                                                                                                                                 |  |
| Chlorophyll a-b binding protein type 2 member 2 (Chlorophyll a-b binding protein type II 2) (CAB) (LHCP)                            | <i>Pinus sylvestris</i>                                        | >sp P15192 C B22_PINSY (1 50 aa)   | 59 - 63: YrVGG     |                                                                                                                                                 |  |
| Chlorophyll a-b binding protein, chloroplastic (LHCII type I CAB) (LHCP)                                                            | <i>Oryza sativa</i> subsp. <i>indica</i>                       | >sp A2XJ35 C B23_ORYSI (2 63 aa)   | 172 - 176: YrVGG   |                                                                                                                                                 |  |
| Chlorophyll a-b binding protein, chloroplastic (LHCII type I CAB) (LHCP)                                                            | <i>Oryza sativa</i> subsp. <i>japonica</i>                     | >sp Q10HD0 CB23_ORYSJ (263 aa)     | 172 - 176: YrVGG   |                                                                                                                                                 |  |
| Chlorophyll a-b binding protein 36, chloroplastic (LHCII type I CAB-36) (LHCP)                                                      | <i>Nicotiana tabacum</i>                                       | >sp P27494 CB23_TOBAC (265 aa)     | 174 - 178: YrVGG   |                                                                                                                                                 |  |
| Chlorophyll a-b binding protein 4, chloroplastic (LHCII type I CAB-4) (LHCP)                                                        | <i>Solanum lycopersicum</i> ( <i>Lycopersicon esculentum</i> ) | >sp P14278 CB24_SOLLC (265 aa)     | 174 - 178: YrVGG   |                                                                                                                                                 |  |
| Chlorophyll a-b binding protein 5, chloroplastic (LHCII type I CAB-5) (LHCP)                                                        | <i>Solanum lycopersicum</i> ( <i>Lycopersicon esculentum</i> ) | >sp P14279 CB25_SOLLC (237 aa)     | 146 - 150: YrVGG   |                                                                                                                                                 |  |
| Chlorophyll a-b binding protein 37, chloroplastic (LHCII type I CAB-37) (LHCP)                                                      | <i>Petunia</i> sp.                                             | >sp P12062 CB26_PETSP (265 aa)     | 174 - 178: YrVGG   |                                                                                                                                                 |  |
| Cysteine--tRNA ligase CPS1, chloroplastic/mitochondrial (EC 6.1.1.16) (Chloroplast synthesis protein 1) (CysteinyI-tRNA synthetase) | <i>Zea mays</i> L.                                             | >sp A0A1D6LAG9 CPS1_MAIZE (564 aa) | 200 - 204: YvVGG   | The chloroplastic isoform of the plant tRNA ligase mediates the replication of the viroids belonging to the family Avsunviroidae [7].           |  |
| Endoribonuclease Dicer homolog 3b (Dicer-like protein 3b) (OsDCL3b) (EC 3.1.26.-)                                                   | <i>Oryza sativa</i> subsp. <i>japonica</i>                     | >sp Q7XD96 DCL3B_ORYSJ (1637 aa)   | 1195 - 1199: YyVGG | Dicer-like proteins are the central enzymes of RNA silencing which regulate gene expression and represent a way of defense against viruses [8]. |  |
| ToMV resistance protein Tm-1(GCR237) (Disease resistance protein Tm-1) (Protein p80(GCR237))                                        | <i>Solanum lycopersicum</i> ( <i>Lycopersicon esculentum</i> ) | >sp A7M6E7 TM1R_SOLLC (754 aa)     | 276 - 280: YvVGG   | Tm-1 resistance protein binds ToMV replication proteins and inhibits the RNA-dependent RNA replication of ToMV [9].                             |  |
| ToMV susceptible protein tm-1(GCR26) (Disease susceptible protein tm-1) (Protein p80(GCR26))                                        | <i>Solanum lycopersicum</i> ( <i>Lycopersicon esculentum</i> ) | >sp A7M6E8 TM1S_SOLLC (754 aa)     | 276 - 280: YvVGG   |                                                                                                                                                 |  |

|                                                                                                                                                                                   |                                                                   |                                            |                  |                                                                                                                                                                                                                                                                                                                                                         |
|-----------------------------------------------------------------------------------------------------------------------------------------------------------------------------------|-------------------------------------------------------------------|--------------------------------------------|------------------|---------------------------------------------------------------------------------------------------------------------------------------------------------------------------------------------------------------------------------------------------------------------------------------------------------------------------------------------------------|
| Disease resistance protein<br>RPV1 (NAD(+) hydrolase<br>RPV1) (EC 3.2.2.6)<br>(Resistance to Plasmopara<br>viticola protein)<br>(MrRPV1)                                          | <i>Vitis rotundifolia</i>                                         | >sp V9M2S5 <br>RPV1_VITRO<br>(1398 aa)     | 223 - 227: YgVGG | Disease resistance proteins<br>RPV1 and RUN1 mediate<br>NAD <sup>+</sup> cleavage that triggers<br>a defense system that<br>promotes programmed cell<br>death as shown against<br>fungal pathogens [10,11].                                                                                                                                             |
| Disease resistance protein<br>RUN1 (NAD(+) hydrolase<br>RUN1) (EC 3.2.2.6)<br>(NADP(+) hydrolase<br>RUN1) (EC 3.2.2.-)<br>(Resistance to Uncinula<br>necator protein)<br>(MrRUN1) | <i>Vitis rotundifolia</i>                                         | >sp V9M398 <br>RUN1_VITRO<br>(1331 aa)     | 228 - 232: YgVGG |                                                                                                                                                                                                                                                                                                                                                         |
| G-type lectin S-receptor-<br>like serine/threonine-<br>protein kinase At1g11280<br>(EC 2.7.11.1)                                                                                  | <i>Arabidopsis thaliana</i>                                       | >sp Q9SXB3 <br>Y1112_ARAT<br>H (820 aa)    | 411 - 415: YsVGG | Role of lectins in plant<br>defense is not entirely<br>elucidated. The lectin gene<br>Restricted TEV movement 1<br>inhibits the systemic<br>movement of potyviruses<br>and Jacalin-Type lectin<br>required for potyvirus<br>resistance 1 impairs the<br>accumulation of plantago<br>asiatica mosaic virus<br>(PIAMV) RNA at the<br>cellular level [12]. |
| L-type lectin-domain<br>containing receptor kinase<br>IX.2 (LecRK-IX.2) (EC<br>2.7.11.1)                                                                                          | <i>Arabidopsis thaliana</i>                                       | >sp Q9LSL5 <br>LRK92_ARAT<br>H (675 aa)    | 132 - 136: YsVGG |                                                                                                                                                                                                                                                                                                                                                         |
| Probable LRR receptor-<br>like serine/threonine-<br>protein kinase At3g47570<br>(EC 2.7.11.1)                                                                                     | <i>Arabidopsis thaliana</i>                                       | >sp C0LGP4 <br>Y3475_ARAT<br>H (1010 aa)   | 892 - 896: YgVGG |                                                                                                                                                                                                                                                                                                                                                         |
| Polyamine oxidase 6<br>(OsPAO6) (EC 1.5.3.-)<br>(Polyamine oxidase B)                                                                                                             | <i>Oryza sativa</i> subsp.<br><i>japonica</i>                     | >sp A0A0P0X<br>M10 PAO6_O<br>RYSJ (496 aa) | 489 - 493: YnVGG | Plants exhibit increased<br>polyamine levels during<br>viral infection, which are<br>rapidly degraded by<br>polyamine oxidases, which<br>are also upregulated upon<br>virus infection [13].                                                                                                                                                             |
| Polyphenol oxidase E,<br>chloroplastic (PPO) (EC<br>1.10.3.1) (Catechol<br>oxidase)                                                                                               | <i>Solanum<br/>lycopersicum<br/>(Lycopersicon<br/>esculentum)</i> | >sp Q08307 P<br>POE_SOLLIC (587 aa)        | 187 - 191: YkVGG |                                                                                                                                                                                                                                                                                                                                                         |
| Catechol oxidase B,<br>chloroplastic (EC 1.10.3.1)<br>(Polyphenol oxidase)<br>(PPO)                                                                                               | <i>Solanum tuberosum</i>                                          | >sp Q06355 P<br>POB_SOLTU<br>(588 aa)      | 188 - 192: YkVGG | The increase of polyphenol<br>oxidase activity was found<br>in tobacco plants infected<br>with tobacco mosaic virus<br>(TMV) [14].                                                                                                                                                                                                                      |
| WAT1-related protein<br>At2g37460                                                                                                                                                 | <i>Arabidopsis thaliana</i>                                       | >sp Q9ZUS1 <br>WTR13_ARAT<br>H (380 aa)    | 268 - 272: YyVGG | The protein Walls are thin 1<br>(WAT1), a plant-specific<br>protein that dictates<br>secondary cell wall<br>thickness of wood fibres<br>and was found to facilitate<br>auxin transport in<br><i>Arabidopsis</i> [15].                                                                                                                                   |
| Histone-lysine N-<br>methyltransferase ATX2<br>(EC 2.1.1.-) (Protein SET<br>DOMAIN GROUP 30)<br>(Trithorax-homolog)                                                               | <i>Arabidopsis thaliana</i>                                       | >sp P0CB22 <br>ATX2_ARAT<br>H (1083 aa)    | 873 - 877: YiVGG | The interaction between<br>HC-Pro from turnip mosaic<br>virus (TuMV) or zucchini<br>yellow mosaic virus<br>(ZYMV) and Hua<br>Enhancer1 (HEN1) led to                                                                                                                                                                                                    |

---

|                                       |                                                         |
|---------------------------------------|---------------------------------------------------------|
| protein 2) (TRX-homolog<br>protein 2) | inhibition of<br>methyltransferase activity<br>[16,17]. |
|---------------------------------------|---------------------------------------------------------|

---
